# Supplementary material for: Clinical Relevance and Molecular Phenotypes in Gastric Cancer, of TP53 Mutations and Gene Expressions, in Combination With Other Gene Mutations
Source: PubMed Central journal article supplement (PMC5052597; doi:10.1038/srep34822), 2016-10-06
Supplement: srep34822-s1.pdf [file srep34822-s1.pdf]

**Clinical Relevance and Molecular Phenotypes in Gastric Cancer, of *TP53* Mutations and Gene Expressions, in Combination With Other Gene Mutations**

Sungjin Park, Jinhyuk Lee, Yon Hui Kim, Jaheun Park,  
Jung-Woog Shin, Seungyoon Nam

**Supplementary Information**

**Contents**

Supplementary Figures S1 through S5

Supplementary Tables S1 through S8

Supplementary Method S1

References in Supplementary Tables

**Supplementary Figure S1.** In whole TCGA GC population, TP53 mutation status is not associated with clinical outcomes (including overall survival **a**, and disease-free survival **b**).

**a Overall Survival (OS)**

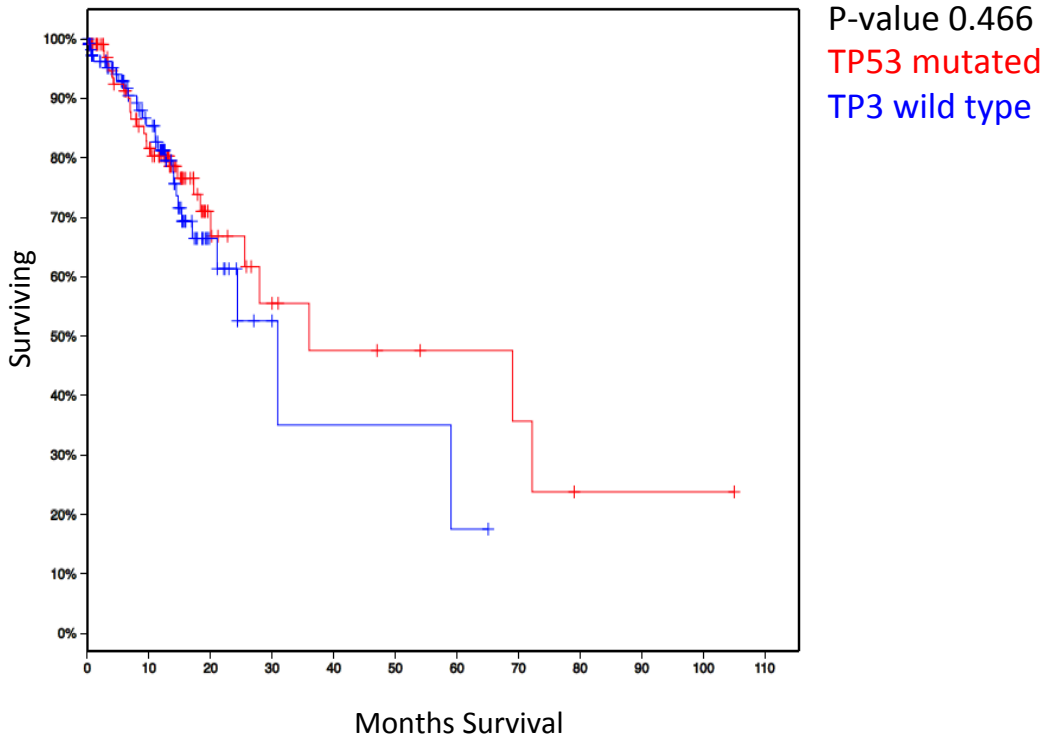

**b Disease-free survival (DFS) according to TP53 mutation status**

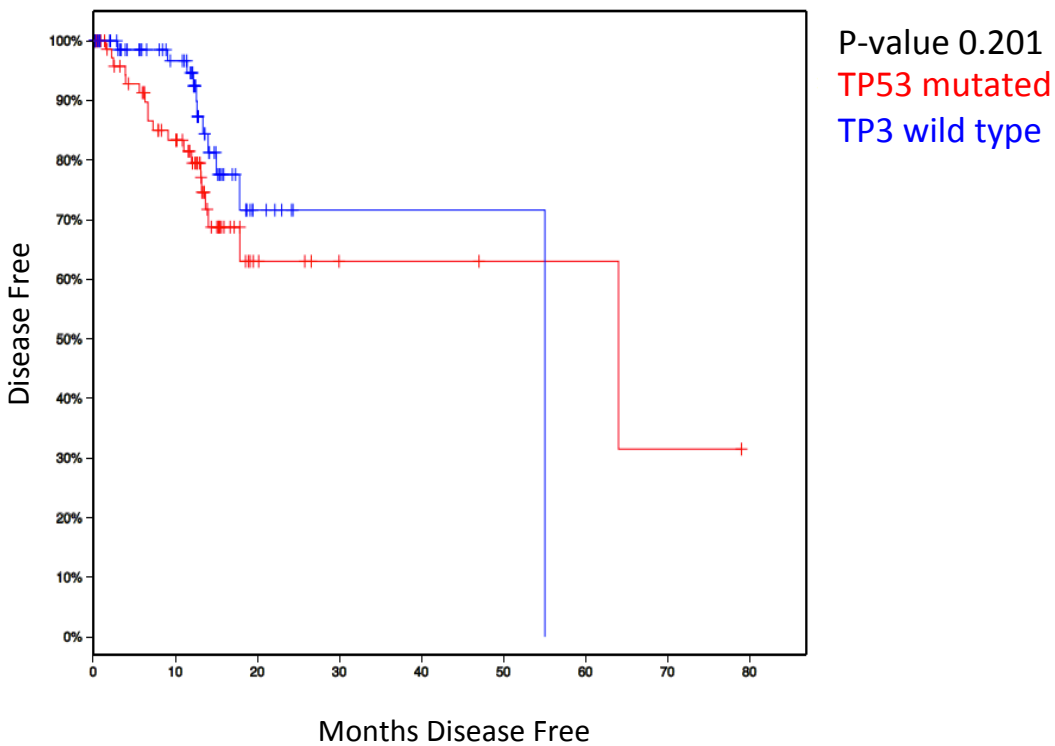

**Supplementary Figure S2.** In the TCGA whole GC population, all the associations with molecular or clinical categories are not significant according to *TP53* mutation status. CIMP represents CpG island methylator phenotype, and MSI microsatellite instability.

***TP53*<sup>MUT</sup>**

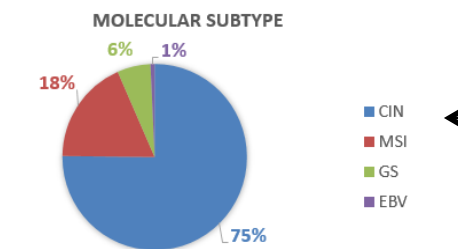

↔  
p-value:  
2.2e-16

***TP53*<sup>WT</sup>**

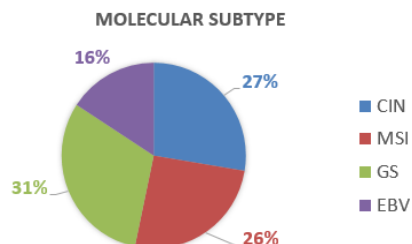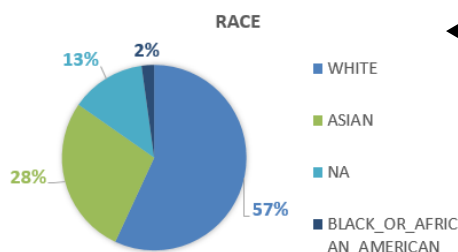

↔  
p-value:  
0.6385

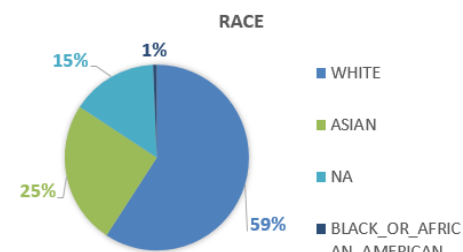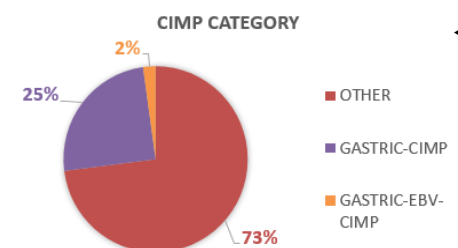

↔  
p-value:  
0.0001586

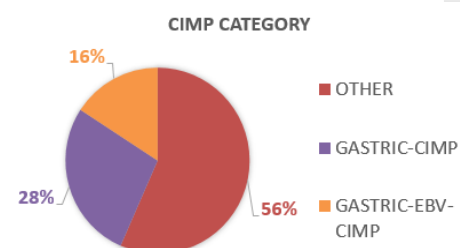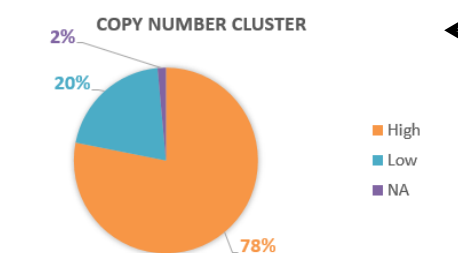

↔  
p-value:  
2.738e-14

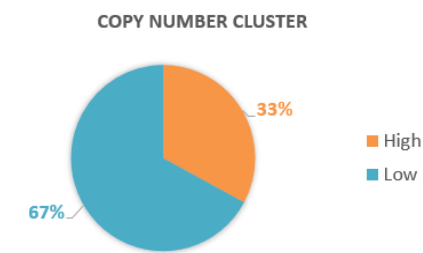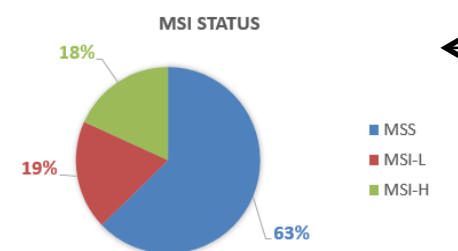

↔  
p-value:  
0.3483

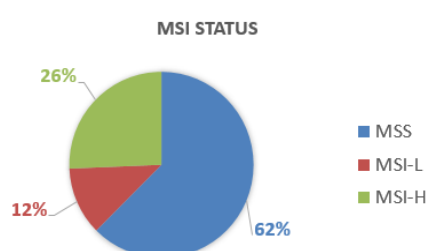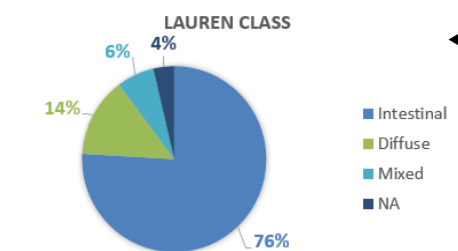

↔  
p-value:  
0.004057

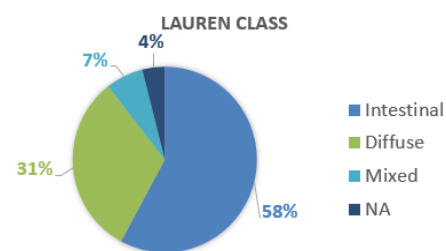



**Supplementary Figure S4.** Structural effects of NRXN1 (green structures; neurexin 1) missense mutations on interactions between NRXN1 and its binding partner, NLGN1 (red structures; neuroligin 1). The missense mutations from the study are shown in the green space-filled model showing the residue numbers and their names. The NLGN1 model is obtained from the experimental structure (PDB ID: 3B3Q with chain A). The NRXN1 structure was generated by a homology modeling method, PQR-SA (pseudo quadratic restraints with simulated annealing). The protein sequence used in NRXN1 spans from 1 to 256 of the first laminin G domain. The best template structure is based on PDB ID 2JD4 with sequence identity of 0.14. The potent maximum sequence identity from ten template combinations is 0.39. The generated structure was validated with validation scores and radius of gyration (Rg). Because the C-terminal area is unfolded, Rg has slightly higher value than one of normal proteins with the same amino acid size. To make NRXN1-NLGN1 complex, an available homologous neuroligin/neurexin-1beta complex structure was used (PDB ID: 3B3Q). The generated homology model of NRXN1 was aligned and superimposed on the neuroligin/neurexin-1beta complex. The R124C and D254G are located near the interface between NLGN1 and the first laminin G domain of NRXN1. It is noted that, in the right structure, Asp254 is unseen due to the rotation.

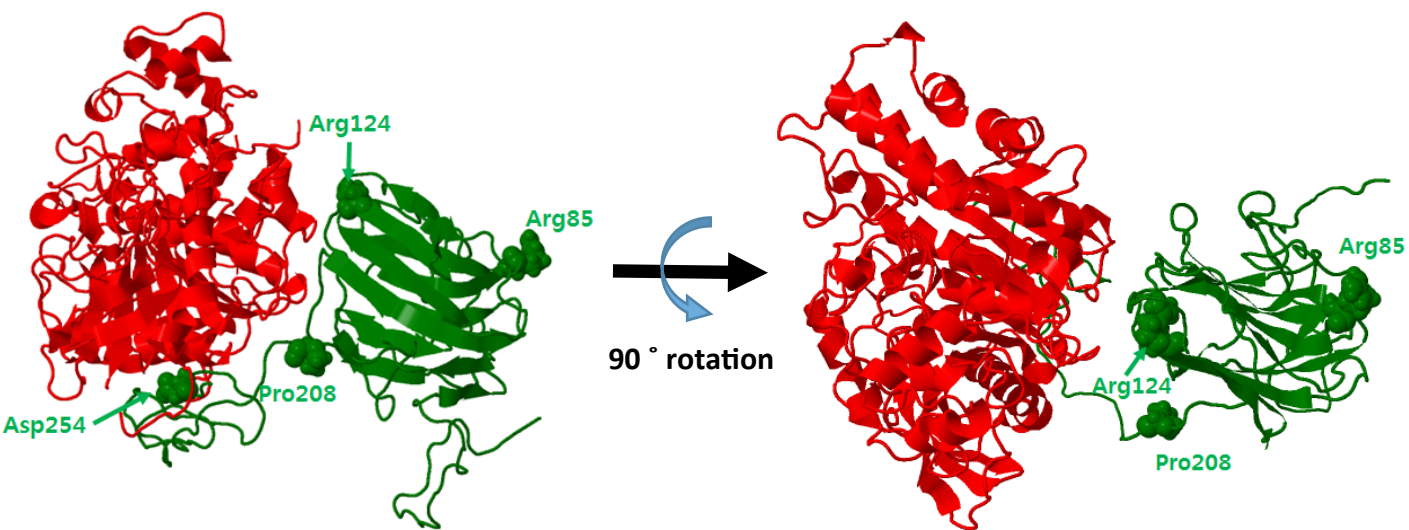

**Supplementary Figure S5. Clinico-molecular profiles of *TP53*<sup>WT</sup> against *NRXN1*<sup>WT</sup> in Group prevalent.** Using dataset “Stomach Adenocarcinoma (TCGA, Nature 2014)” in cBioPortal (access as of 03/20/2016), we inspected the profiles of 87 patient samples belonging to *TP53*<sup>WT</sup> against *NRXN1*<sup>WT</sup>. It is noted that these patients correspond to “B1” of Figure 2a.

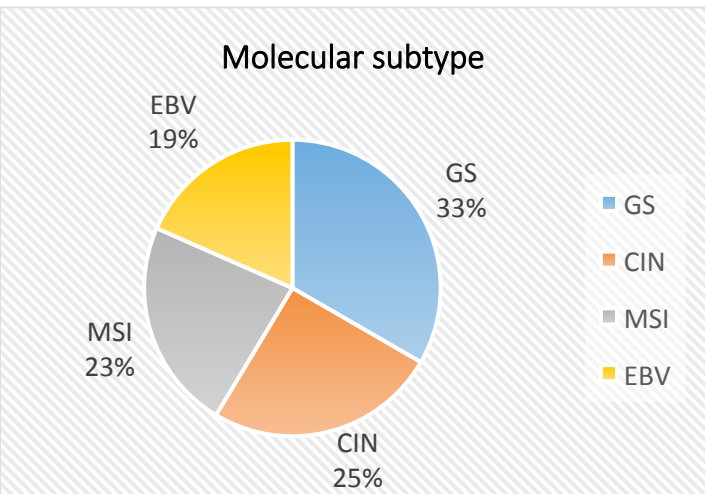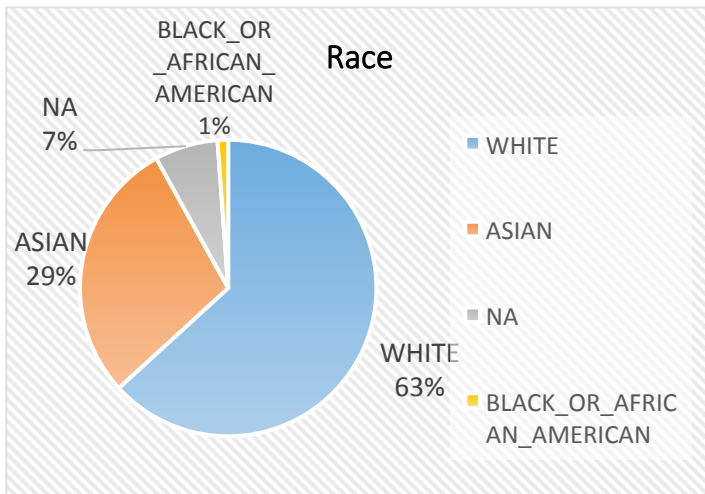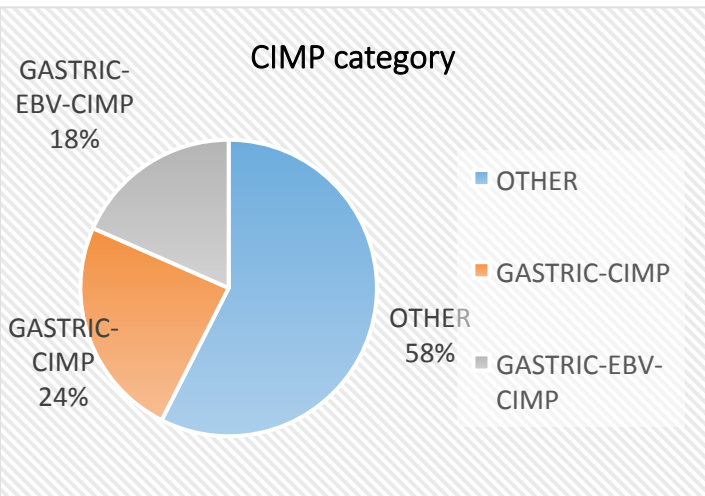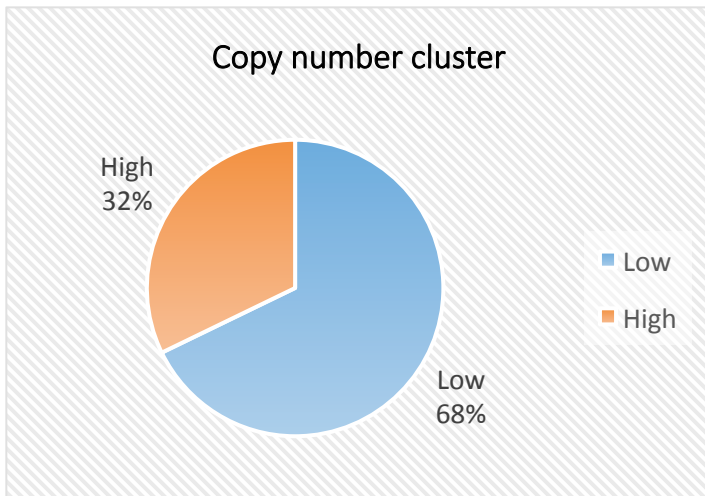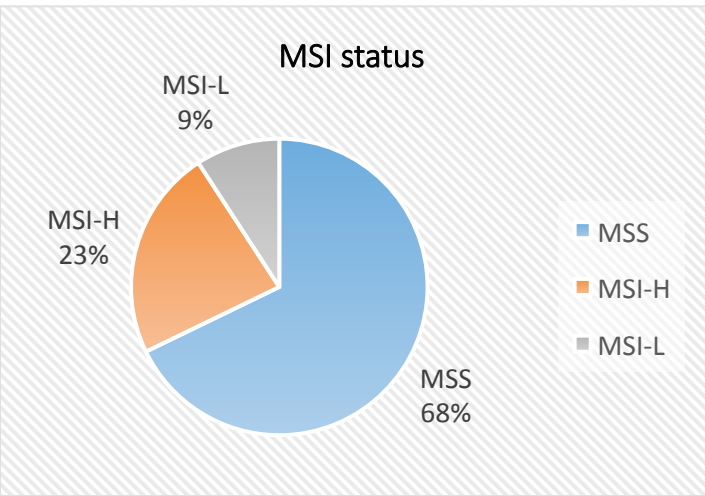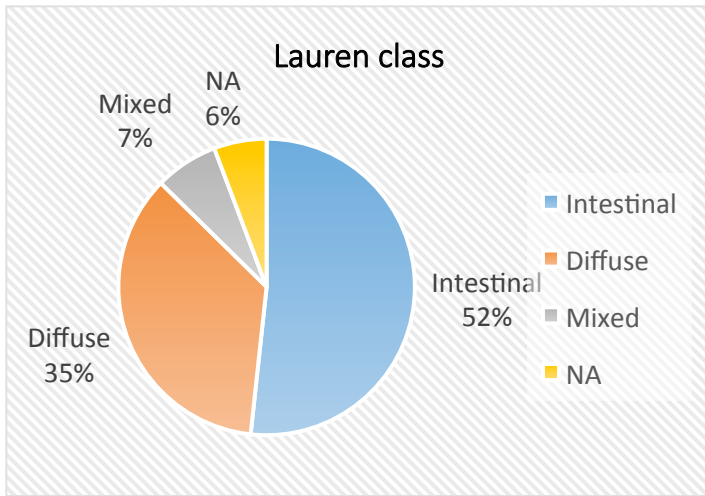

**Supplementary Table S1.** For various categories, proportional tests (p-value) and the number of patients between  $TP53^{WT}$  and  $TP53^{MUT}$  in Group prevalent. Given a row, column “Proportions of  $TP53^{WT}$ ” was obtained from column “ $TP53^{WT}$  (# of patients)” over summation of columns “ $TP53^{WT}$  (# of patients)” and “ $TP53^{MUT}$  (# of patients)”.

| Category            | Proportional test result |                             |                              | p-value                    |          |
|---------------------|--------------------------|-----------------------------|------------------------------|----------------------------|----------|
| Molecular Subtype   |                          | $TP53^{WT}$ (# of patients) | $TP53^{MUT}$ (# of patients) | Proportions of $TP53^{WT}$ | 3.48E-11 |
|                     | CIN                      | 24                          | 65                           | 0.2696629                  |          |
|                     | EBV                      | 16                          | 1                            | 0.9411765                  |          |
|                     | GS                       | 29                          | 5                            | 0.8529412                  |          |
|                     | MSI                      | 26                          | 15                           | 0.6341463                  |          |
| CIMP CATEGORY       |                          | $TP53^{WT}$ (# of patients) | $TP53^{MUT}$ (# of patients) | Proportions of $TP53^{WT}$ | 0.001191 |
|                     | GASTRIC-CIMP             | 26                          | 23                           | 0.5306122                  |          |
|                     | GASTRIC-EBV              | 16                          | 1                            | 0.9411765                  |          |
|                     | OTHER                    | 53                          | 61                           | 0.4649123                  |          |
| COPY NUMBER CLUSTER |                          | $TP53^{WT}$ (# of patients) | $TP53^{MUT}$ (# of patients) | Proportions of $TP53^{WT}$ | 1.72E-10 |
|                     | High                     | 30                          | 68                           | 0.3061224                  |          |
|                     | Low                      | 65                          | 16                           | 0.8024691                  |          |
|                     | NA                       | 0                           | 1                            | 0                          |          |
| MSI STATUS          |                          | $TP53^{WT}$ (# of patients) | $TP53^{MUT}$ (# of patients) | Proportions of $TP53^{WT}$ | 0.1189   |
|                     | MSI-H                    | 26                          | 15                           | 0.6341463                  |          |
|                     | MSI-L                    | 8                           | 14                           | 0.3636364                  |          |
|                     | MSS                      | 61                          | 56                           | 0.5213675                  |          |
| LAUREN CLASS        |                          | $TP53^{WT}$ (# of patients) | $TP53^{MUT}$ (# of patients) | Proportions of $TP53^{WT}$ | 0.01636  |
|                     | Diffuse                  | 31                          | 12                           | 0.7209302                  |          |
|                     | Intestinal               | 52                          | 63                           | 0.4521739                  |          |
|                     | Mixed                    | 7                           | 8                            | 0.4666667                  |          |
|                     | NA                       | 5                           | 2                            | 0.7142857                  |          |
| RACE                |                          | $TP53^{WT}$ (# of patients) | $TP53^{MUT}$ (# of patients) | Proportions of $TP53^{WT}$ | 0.8026   |
|                     | ASIAN                    | 28                          | 26                           | 0.5185185                  |          |
|                     | BLACK or AA              | 1                           | 2                            | 0.3333333                  |          |
|                     | WHITE                    | 59                          | 53                           | 0.5267857                  |          |
|                     | NA                       | 7                           | 4                            | 0.6363636                  |          |

**Supplementary Table S2.** Characterization of GC cell lines having *TP53*<sup>MUT</sup>. *NRXN1* mutation status of GC cell lines with *TP53*<sup>MUT</sup> from Liu et al., 2014 <sup>1</sup> are depicted. Also, patient groups aligned by the cell lines are indicated in column “Is it Group prevalent?”. The three cell lines (SNU-16, FU97, SNU-668) are aligned with the patients of Group prevalent by using the correlation classification method (CCM <sup>2</sup>). The three cell lines were further inspected in terms of different drug sensitivities by using CMAP <sup>3</sup>.

| Cell Line | NRXN1 mutation | Is it Group prevalent? | Gender | Histology / Subtype          | Source |
|-----------|----------------|------------------------|--------|------------------------------|--------|
| SNU-601   | No             | No                     | M      | Carcinoma / NS               | KCLB   |
| MKN1      | No             | No                     | M      | Carcinoma / mixed            | HSRRB  |
| MKN74     | No             | No                     | M      | Carcinoma / tubular          | HSRRB  |
| MKN7      | No             | No                     | M      | Carcinoma / tubular          | RIKEN  |
| SNU-620   | No             | No                     | F      | Carcinoma / NS               | KCLB   |
| SNU-16    | No             | Yes                    | F      | Carcinoma / undifferentiated | KCLB   |
| FU97      | No             | Yes                    | F      | Carcinoma / diffuse          | HSRRB  |
| IM95      | No             | No                     | M      | Carcinoma / intestinal       | HSRRB  |
| NCI-N87   | Yes            | No                     | M      | Carcinoma / NS               | ATCC   |
| SNU-668   | Yes            | Yes                    | M      | Carcinoma / signet ring      | KCLB   |
| NUGC-3    | Yes            | No                     | M      | Carcinoma / NS               | HSRRB  |



**Supplementary Table S3.** The *NRXN1* mutation types in the *NRXN1*<sup>MUT</sup> and *TP53*<sup>MUT</sup> patients in Group prevalent according to UCSC CGB and cBio Portal annotations. We inspected mutation positions of *NRXN1* for 3D structure study. Based on MutationAssessor from cBio Portal, the five mutation positions (R85H, R124C, P208L, D254G and L271V toward N-terminus; in bold) which are located in or near the first laminin G-protein domain of *NRXN1* were correctly aligned to the UniProt protein sequence (UniProt ID: NRX1A\_HUMAN) of *NRXN1*, while the other mutation positions toward C-terminus not. For structural analysis of mutations, four mutations (R85H, R124, P208, and D254) filled in gray were considered because the four except L271 belong to the first laminin G-protein domain.

| Sample ID           | Mutation Status in UCSC CGB <sup>a</sup> | cBio Portal mutation description <sup>b</sup> |
|---------------------|------------------------------------------|-----------------------------------------------|
| TCGA-BR-A4IY        | Yes                                      | Y483N                                         |
| TCGA-CD-A486        | Yes                                      | V1370A                                        |
| TCGA-CD-A489        | Yes                                      | D927N                                         |
| TCGA-CD-A48C        | Yes                                      | G656V                                         |
| TCGA-HU-8604        | Yes                                      | F530L                                         |
| TCGA-HU-A4GF        | Yes                                      | E1353K                                        |
| TCGA-HU-A4GX        | Yes                                      | A1382V                                        |
| <b>TCGA-HU-A4H2</b> | <b>Yes</b>                               | <b>P208L</b>                                  |
| <b>TCGA-HU-A4H3</b> | <b>Yes</b>                               | <b>D254G</b>                                  |
| <b>TCGA-HU-A4H4</b> | Yes                                      | <b>L271V</b>                                  |
| TCGA-FP-A4BE        | Yes                                      | Y1490H                                        |
| TCGA-BR-8487        | Yes                                      | L606P                                         |
| <b>TCGA-EQ-8122</b> | <b>Yes</b>                               | <b>R85H</b>                                   |
| TCGA-IN-7808        | Yes                                      | G1326R                                        |
| <b>TCGA-HF-7132</b> | <b>Yes</b>                               | <b>R124C</b>                                  |
| TCGA-F1-6874        | Yes                                      | R1311C, L158Afs*29                            |
| TCGA-BR-6803        | Yes                                      | L658Cfs*51                                    |
| TCGA-HU-A4GN        | Yes                                      | - (N/A)                                       |
| TCGA-CG-5726        | Yes                                      | - (N/A)                                       |

<sup>a</sup>Mutation status had identified with TCGA\_STAD\_mutation\_curated\_broad\_gene-2015-01-28 dataset. Version 2015/01/28.

<sup>b</sup>As of access on 2015-09-24 (Version "TCGA, Nature 2014").

**Supplementary Table S4.** Genes, miRNAs and upstream regulators of our WNT signaling network in Figure 2b.

| <b>Categories in the network</b>                                      | <b>Names</b>                                                                                                                                                              | <b>Sources</b>                                                         |
|-----------------------------------------------------------------------|---------------------------------------------------------------------------------------------------------------------------------------------------------------------------|------------------------------------------------------------------------|
| Genes                                                                 | <i>PRKACG, PSEN1, RUVBL1, AXIN2, CTNNB1, LEF1, MMP7, WNT9A, WNT5A, FZD1, DAAM2, NKD1, DVL3, FZD8, VANGL1, PRICKLE1, PRICKLE2, VANGL2, FZD4, PPP3CA</i> (20 genes)         | Detection by PATHOME algorithm in our previous study <sup>4</sup> .    |
|                                                                       | <i>GNB1, GNB4, GNB5, GNG2, PLCB1, PLCB2, PRKCB, NCF1, PLCG1, PLCG2, NFAT5, NFATC1, NFATC2, PTGS2</i> (14 genes)                                                           | Manual curation.                                                       |
| miRNAs                                                                | hsa-mir-155, hsa-mir-183, hsa-mir-34a, hsa-mir-200a, hsa-mir-21, hsa-mir-30a, hsa-mir-186, hsa-mir-145, hsa-mir-184, hsa-let-7b (10 miRNAs)                               | miRTarBase release 4.2 <sup>5</sup> , and TransmiR v1.1 <sup>6</sup> . |
| Upstream regulators (including TFs and signaling molecules) of miRNAs | <i>TRIM32, EIF2C2, LIN28A, MECP2, MYC, IFNG, SRC, IFNB1, TP53, EGR1, CEBPA, NR1H4, NFKB1, CAMP, BCR, BMP4, ZEB1, ZEB2, TGFB1, TWIST1</i> (20 upstream TFs and regulators) |                                                                        |

**Supplementary Table S5.** The clinico-molecular characteristics between  $NRXN1^{WT}-TP53^{MUT}$  and  $NRXN1^{MUT}-TP53^{MUT}$  patients in Group prevalent.

| Category            | Sub category              | $NRXN1^{WT}-TP53^{MUT}$ | $NRXN1^{MUT}-TP53^{MUT}$ | Fisher's exact test (p-value) | P-value <sup>a</sup> |
|---------------------|---------------------------|-------------------------|--------------------------|-------------------------------|----------------------|
| CIMP category       | OTHER                     | 53                      | 8                        | 0.00274                       | 0.00718              |
|                     | GASTRIC-CIMP              | 13                      | 10                       | 0.00771                       |                      |
|                     | GASTRIC-EBV-CIMP          | 0                       | 1                        | 0.22350                       |                      |
| Copy number cluster | Low                       | 8                       | 8                        | 0.00655                       | 0.00579              |
|                     | High                      | 58                      | 10                       | 0.00191                       |                      |
|                     | NA                        | 0                       | 1                        | 0.22350                       |                      |
| Lauren class        | Intestinal                | 48                      | 15                       | 0.76860                       | 0.67530              |
|                     | Diffuse                   | 8                       | 4                        | 0.45320                       |                      |
|                     | Mixed                     | 8                       | 0                        | 0.18970                       |                      |
|                     | NA                        | 2                       | 0                        | 1.0                           |                      |
| Molecular subtype   | CIN                       | 56                      | 9                        | 0.00161                       | 0.00056              |
|                     | MSI                       | 6                       | 9                        | 0.00052                       |                      |
|                     | GS                        | 4                       | 1                        | 1.0                           |                      |
|                     | EBV                       | 0                       | 0                        | -                             |                      |
| MSI status          | MSS                       | 46                      | 10                       | 0.18110                       | 0.00068              |
|                     | MSI-H                     | 14                      | 9                        | 0.00052                       |                      |
|                     | MSI-L                     | 6                       | 0                        | 0.03275                       |                      |
| Race category       | WHITE                     | 48                      | 5                        | 0.00039                       | 0.00333              |
|                     | ASIAN                     | 15                      | 11                       | 0.00921                       |                      |
|                     | BLACK_OR_AFRICAN_AMERICAN | 1                       | 1                        | 0.39920                       |                      |
|                     | NA                        | 2                       | 2                        | 0.21470                       |                      |

<sup>a</sup>P-value is obtained from the proportional test for each category.

**Supplementary Table S6.** Bootstrapping for all GC patients, and its molecular/clinical analysis. In each repeat, we sampled two random groups (Grp1 and Grp2 indicated in the table) by bootstrapping against all GC patients (see “Experiment design 1” in Supplementary Method S1). In each repeat, we inspected clinico-molecular profiles based on the two random groups.

| Category            | Sub category              | Repeat 1          |                   |                    | Repeat 2          |                   |                    | Repeat 3          |                   |                    | Repeat 4          |                   |                    | Repeat 5          |                   |                    |
|---------------------|---------------------------|-------------------|-------------------|--------------------|-------------------|-------------------|--------------------|-------------------|-------------------|--------------------|-------------------|-------------------|--------------------|-------------------|-------------------|--------------------|
|                     |                           | Grp1 <sup>a</sup> | Grp2 <sup>b</sup> | p-val <sup>c</sup> | Grp1 <sup>a</sup> | Grp2 <sup>b</sup> | p-val <sup>c</sup> | Grp1 <sup>a</sup> | Grp2 <sup>b</sup> | p-val <sup>c</sup> | Grp1 <sup>a</sup> | Grp2 <sup>b</sup> | p-val <sup>c</sup> | Grp1 <sup>a</sup> | Grp2 <sup>b</sup> | p-val <sup>c</sup> |
| CIMP category       | OTHER                     | 43                | 13                | 0.276              | 45                | 16                | 0.393              | 41                | 13                | 0.367              | 40                | 12                | 0.976              | 40                | 9                 | 0.578              |
|                     | GASTRIC-CIMP              | 16                | 2                 |                    | 14                | 2                 |                    | 13                | 5                 |                    | 19                | 5                 |                    | 19                | 7                 |                    |
|                     | GASTRIC-EBV-CIMP          | 7                 | 4                 |                    | 7                 | 1                 |                    | 12                | 1                 |                    | 7                 | 2                 |                    | 7                 | 3                 |                    |
| Copy number cluster | Low                       | 20                | 6                 | 0.624              | 26                | 11                | 0.330              | 29                | 11                | 0.512              | 31                | 7                 | 0.144              | 34                | 9                 | 0.954              |
|                     | High                      | 45                | 12                |                    | 39                | 8                 |                    | 36                | 8                 |                    | 35                | 11                |                    | 32                | 10                |                    |
|                     | NA                        | 1                 | 1                 |                    | 1                 | 0                 |                    | 1                 | 0                 |                    | 0                 | 1                 |                    | 0                 | 0                 |                    |
| Lauren class        | Intestinal                | 43                | 11                | 0.701              | 45                | 13                | 0.680              | 37                | 15                | 0.254              | 39                | 15                | 0.328              | 44                | 14                | 0.666              |
|                     | Diffuse                   | 13                | 5                 |                    | 12                | 5                 |                    | 20                | 2                 |                    | 18                | 3                 |                    | 16                | 3                 |                    |
|                     | Mixed                     | 9                 | 2                 |                    | 7                 | 1                 |                    | 7                 | 2                 |                    | 6                 | 0                 |                    | 4                 | 2                 |                    |
|                     | NA                        | 1                 | 1                 |                    | 2                 | 0                 |                    | 2                 | 0                 |                    | 3                 | 1                 |                    | 2                 | 0                 |                    |
| Molecular subtype   | CIN                       | 40                | 10                | 0.642              | 36                | 8                 | 0.596              | 32                | 8                 | 0.064              | 34                | 10                | 0.653              | 30                | 9                 | 0.783              |
|                     | MSI                       | 10                | 2                 |                    | 9                 | 3                 |                    | 7                 | 6                 |                    | 11                | 5                 |                    | 16                | 5                 |                    |
|                     | GS                        | 9                 | 3                 |                    | 15                | 7                 |                    | 17                | 5                 |                    | 14                | 2                 |                    | 13                | 2                 |                    |
|                     | EBV                       | 7                 | 4                 |                    | 6                 | 1                 |                    | 10                | 0                 |                    | 7                 | 2                 |                    | 7                 | 3                 |                    |
| MSI status          | MSS                       | 47                | 13                | 0.680              | 49                | 12                | 0.567              | 51                | 8                 | 0.012              | 51                | 11                | 0.203              | 43                | 14                | 0.333              |
|                     | MSI-H                     | 10                | 2                 |                    | 9                 | 3                 |                    | 7                 | 6                 |                    | 11                | 5                 |                    | 16                | 5                 |                    |
|                     | MSI-L                     | 9                 | 4                 |                    | 8                 | 4                 |                    | 8                 | 5                 |                    | 4                 | 3                 |                    | 7                 | 0                 |                    |
| Race category       | WHITE                     | 43                | 10                | 0.666              | 44                | 13                | 0.911              | 38                | 10                | 0.204              | 42                | 14                | 0.567              | 44                | 13                | 0.765              |
|                     | ASIAN                     | 18                | 6                 |                    | 19                | 5                 |                    | 25                | 6                 |                    | 16                | 3                 |                    | 15                | 5                 |                    |
|                     | BLACK_OR_AFRICAN_AMERICAN | 2                 | 1                 |                    | 1                 | 0                 |                    | 1                 | 0                 |                    | 1                 | 1                 |                    | 0                 | 0                 |                    |
|                     | NA                        | 3                 | 2                 |                    | 2                 | 1                 |                    | 2                 | 3                 |                    | 7                 | 1                 |                    | 7                 | 1                 |                    |

<sup>a</sup>Grp1: Group 1 (a random group with its size 66 patients; see the detail in Supplementary Method S1)

<sup>b</sup>Grp2: Group 2 (a random group with its size 19 patients; see the detail in Supplementary Method S1)

<sup>c</sup>p-val is the p-value of proportional test for each category.

**Supplementary Table S7.** Bootstrapping for all *TP53*<sup>MUT</sup> GC patients, and its molecular/clinical analysis. In each repeat, we sampled two random groups (Grp1 and Grp2 indicated in the table) by bootstrapping against all *TP53*<sup>MUT</sup> GC patients (see “Experiment design 2” in Supplementary Method S1). In each repeat, we inspected clinico-molecular profiles based on the two random groups.

| Category            | Sub category              | Repeat 1          |                   |                    | Repeat 2          |                   |                    | Repeat 3          |                   |                    | Repeat 4          |                   |                    | Repeat 5          |                   |                    |
|---------------------|---------------------------|-------------------|-------------------|--------------------|-------------------|-------------------|--------------------|-------------------|-------------------|--------------------|-------------------|-------------------|--------------------|-------------------|-------------------|--------------------|
|                     |                           | Grp1 <sup>a</sup> | Grp2 <sup>b</sup> | p-val <sup>c</sup> | Grp1 <sup>a</sup> | Grp2 <sup>b</sup> | p-val <sup>c</sup> | Grp1 <sup>a</sup> | Grp2 <sup>b</sup> | p-val <sup>c</sup> | Grp1 <sup>a</sup> | Grp2 <sup>b</sup> | p-val <sup>c</sup> | Grp1 <sup>a</sup> | Grp2 <sup>b</sup> | p-val <sup>c</sup> |
| CIMP category       | OTHER                     | 46                | 15                | 0.617              | 48                | 11                | 0.445              | 44                | 13                | 0.635              | 42                | 15                | 0.403              | 44                | 13                | 0.596              |
|                     | GASTRIC-CIMP              | 20                | 4                 |                    | 15                | 7                 |                    | 19                | 6                 |                    | 22                | 4                 |                    | 21                | 5                 |                    |
|                     | GASTRIC-EBV-CIMP          | 0                 | 0                 |                    | 3                 | 1                 |                    | 3                 | 0                 |                    | 2                 | 0                 |                    | 1                 | 1                 |                    |
| Copy number cluster | Low                       | 8                 | 6                 | 0.107              | 17                | 7                 | 0.571              | 10                | 2                 | 0.892              | 16                | 2                 | 0.411              | 13                | 5                 | 0.716              |
|                     | High                      | 56                | 12                |                    | 48                | 12                |                    | 56                | 17                |                    | 48                | 16                |                    | 51                | 13                |                    |
|                     | NA                        | 2                 | 1                 |                    | 1                 | 0                 |                    | 0                 | 0                 |                    | 2                 | 1                 |                    | 2                 | 1                 |                    |
| Lauren class        | Intestinal                | 49                | 13                | 0.589              | 49                | 13                | 0.642              | 52                | 12                | 0.197              | 55                | 17                | 0.902              | 51                | 15                | 0.723              |
|                     | Diffuse                   | 8                 | 2                 |                    | 11                | 5                 |                    | 10                | 4                 |                    | 5                 | 1                 |                    | 8                 | 3                 |                    |
|                     | Mixed                     | 7                 | 4                 |                    | 3                 | 0                 |                    | 4                 | 2                 |                    | 5                 | 1                 |                    | 4                 | 0                 |                    |
|                     | NA                        | 2                 | 0                 |                    | 3                 | 1                 |                    | 0                 | 1                 |                    | 1                 | 0                 |                    | 3                 | 1                 |                    |
| Molecular subtype   | CIN                       | 54                | 11                | 0.075              | 47                | 11                | 0.452              | 51                | 17                | 0.497              | 48                | 15                | 0.686              | 46                | 13                | 0.785              |
|                     | MSI                       | 9                 | 5                 |                    | 11                | 6                 |                    | 12                | 1                 |                    | 13                | 2                 |                    | 16                | 4                 |                    |
|                     | GS                        | 3                 | 3                 |                    | 6                 | 2                 |                    | 2                 | 1                 |                    | 4                 | 2                 |                    | 4                 | 2                 |                    |
|                     | EBV                       | 0                 | 0                 |                    | 2                 | 0                 |                    | 1                 | 0                 |                    | 1                 | 0                 |                    | 0                 | 0                 |                    |
| MSI status          | MSS                       | 41                | 12                | 0.252              | 38                | 10                | 0.312              | 40                | 11                | 0.214              | 40                | 12                | 0.599              | 39                | 12                | 0.946              |
|                     | MSI-H                     | 9                 | 5                 |                    | 11                | 6                 |                    | 12                | 1                 |                    | 13                | 2                 |                    | 16                | 4                 |                    |
|                     | MSI-L                     | 16                | 2                 |                    | 17                | 3                 |                    | 14                | 7                 |                    | 13                | 5                 |                    | 11                | 3                 |                    |
| Race category       | WHITE                     | 36                | 8                 | 0.676              | 38                | 9                 | 0.149              | 37                | 9                 | 0.736              | 40                | 10                | 0.652              | 29                | 10                | 0.532              |
|                     | ASIAN                     | 17                | 6                 |                    | 19                | 10                |                    | 21                | 8                 |                    | 16                | 7                 |                    | 20                | 7                 |                    |
|                     | BLACK_OR_AFRICAN_AMERICAN | 3                 | 2                 |                    | 1                 | 0                 |                    | 2                 | 0                 |                    | 2                 | 0                 |                    | 3                 | 0                 |                    |
|                     | NA                        | 10                | 3                 |                    | 8                 | 0                 |                    | 6                 | 2                 |                    | 8                 | 2                 |                    | 14                | 2                 |                    |

<sup>a</sup>Grp1: Group 1 (a random group with its size 66 patients; see the detail in Supplementary Method S1)

<sup>b</sup>Grp2: Group 2 (a random group with its size 19 patients; see the detail in Supplementary Method S1)

<sup>c</sup>p-val is the p-value of proportional test for each category.

**Supplementary Table S8.** Bootstrapping for all *TP53*<sup>WT</sup> GC patients, and its molecular/clinical analysis. In each repeat, we sampled two random groups (Grp1 and Grp2 indicated in the table) by bootstrapping against all *TP53*<sup>WT</sup> GC patients (see “Experiment design 3” in Supplementary Method S1). In each repeat, we inspected clinico-molecular profiles based on the two random groups.

| Category            | Sub category              | Repeat 1          |                   |                    | Repeat 2          |                   |                    | Repeat 3          |                   |                    | Repeat 4          |                   |                    | Repeat 5          |                   |                    |
|---------------------|---------------------------|-------------------|-------------------|--------------------|-------------------|-------------------|--------------------|-------------------|-------------------|--------------------|-------------------|-------------------|--------------------|-------------------|-------------------|--------------------|
|                     |                           | Grp1 <sup>a</sup> | Grp2 <sup>b</sup> | p-val <sup>c</sup> | Grp1 <sup>a</sup> | Grp2 <sup>b</sup> | p-val <sup>c</sup> | Grp1 <sup>a</sup> | Grp2 <sup>b</sup> | p-val <sup>c</sup> | Grp1 <sup>a</sup> | Grp2 <sup>b</sup> | p-val <sup>c</sup> | Grp1 <sup>a</sup> | Grp2 <sup>b</sup> | p-val <sup>c</sup> |
| CIMP category       | OTHER                     | 33                | 12                | 0.597              | 33                | 10                | 0.871              | 3                 | 11                | 0.996              | 42                | 8                 | 0.144              | 40                | 14                | 0.218              |
|                     | GASTRIC-CIMP              | 23                | 5                 |                    | 19                | 6                 |                    | 17                | 5                 |                    | 16                | 9                 |                    | 23                | 3                 |                    |
|                     | GASTRIC-EBV-CIMP          | 10                | 2                 |                    | 14                | 3                 |                    | 11                | 3                 |                    | 8                 | 2                 |                    | 3                 | 2                 |                    |
| Copy number cluster | Low                       | 46                | 16                | 0.336              | 44                | 9                 | 0.207              | 45                | 12                | 0.894              | 36                | 15                | 0.099              | 42                | 11                | 0.852              |
|                     | High                      | 20                | 3                 |                    | 22                | 10                |                    | 21                | 7                 |                    | 30                | 4                 |                    | 24                | 8                 |                    |
|                     | NA                        | 0                 | 0                 |                    | 0                 | 0                 |                    | 0                 | 0                 |                    | 0                 | 0                 |                    | 0                 | 0                 |                    |
| Lauren class        | Intestinal                | 45                | 7                 | 0.008              | 34                | 12                | 0.811              | 38                | 12                | 0.858              | 42                | 7                 | 0.029              | 40                | 11                | 0.797              |
|                     | Diffuse                   | 17                | 12                |                    | 25                | 5                 |                    | 20                | 5                 |                    | 14                | 8                 |                    | 19                | 7                 |                    |
|                     | Mixed                     | 4                 | 0                 |                    | 4                 | 1                 |                    | 6                 | 2                 |                    | 8                 | 1                 |                    | 5                 | 1                 |                    |
|                     | NA                        | 0                 | 0                 |                    | 3                 | 1                 |                    | 2                 | 0                 |                    | 2                 | 3                 |                    | 2                 | 0                 |                    |
| Molecular subtype   | CIN                       | 18                | 2                 | 0.176              | 18                | 8                 | 0.346              | 20                | 7                 | 0.865              | 25                | 4                 | 0.312              | 23                | 8                 | 0.194              |
|                     | MSI                       | 20                | 5                 |                    | 12                | 5                 |                    | 15                | 5                 |                    | 17                | 9                 |                    | 23                | 2                 |                    |
|                     | GS                        | 18                | 10                |                    | 22                | 3                 |                    | 20                | 4                 |                    | 16                | 4                 |                    | 17                | 7                 |                    |
|                     | EBV                       | 10                | 2                 |                    | 14                | 3                 |                    | 11                | 3                 |                    | 8                 | 2                 |                    | 3                 | 2                 |                    |
| MSI status          | MSS                       | 41                | 13                | 0.868              | 47                | 10                | 0.288              | 42                | 9                 | 0.338              | 38                | 9                 | 0.143              | 36                | 13                | 0.095              |
|                     | MSI-H                     | 20                | 5                 |                    | 12                | 5                 |                    | 15                | 5                 |                    | 17                | 9                 |                    | 23                | 2                 |                    |
|                     | MSI-L                     | 5                 | 1                 |                    | 7                 | 4                 |                    | 9                 | 5                 |                    | 11                | 1                 |                    | 7                 | 4                 |                    |
| Race category       | WHITE                     | 36                | 12                | 0.696              | 44                | 9                 | 0.197              | 45                | 10                | 0.507              | 37                | 14                | 0.282              | 40                | 13                | 0.815              |
|                     | ASIAN                     | 18                | 5                 |                    | 17                | 9                 |                    | 14                | 7                 |                    | 18                | 2                 |                    | 14                | 3                 |                    |
|                     | BLACK_OR_AFRICAN_AMERICAN | 0                 | 0                 |                    | 0                 | 0                 |                    | 1                 | 0                 |                    | 0                 | 0                 |                    | 0                 | 0                 |                    |
|                     | NA                        | 12                | 2                 |                    | 5                 | 1                 |                    | 6                 | 2                 |                    | 11                | 3                 |                    | 12                | 3                 |                    |

<sup>a</sup>Grp1: Group 1 (a random group with its size 66 patients; see the detail in Supplementary Method S1)

<sup>b</sup>Grp2: Group 2 (a random group with its size 19 patients; see the detail in Supplementary Method S1)

<sup>c</sup>p-val is the p-value of proportional test for each category.

## Supplementary Method S1

### Design of three experiments, and bootstrapping

The group (B3) of  $NRXN1^{WT}$  and  $TP53^{MUT}$  in Group prevalent amounts to 66 patients. The group (B4) of  $NRXN1^{MUT}$  and  $TP53^{MUT}$  in Group prevalent amounts to 19 patients. We inspected non-randomness of the two subgroups, regarding clinical and molecular profiles. For the purpose, we randomly picked up two groups having the same group sizes (66, and 19 patients respectively) by bootstrapping under the three experiment designs in the following.

- 1) Experiment design 1: bootstrapping two groups *against all GC patients* (Experiment design 1, in Figure SM1).
- 2) Experiment design 2: bootstrapping two groups *against  $TP53^{MUT}$  patients* (Experiment design 2, in Figure SM1)
- 3) Experiment design 3: bootstrapping two groups *against  $TP53^{WT}$  patients* (Experiment design 3, in Figure SM1)

For convenience in description, we set a random 66-patient samples to Group 1, and a random 19-patient group to Group 2. Given an experiment design, we repeated bootstrapping five times.

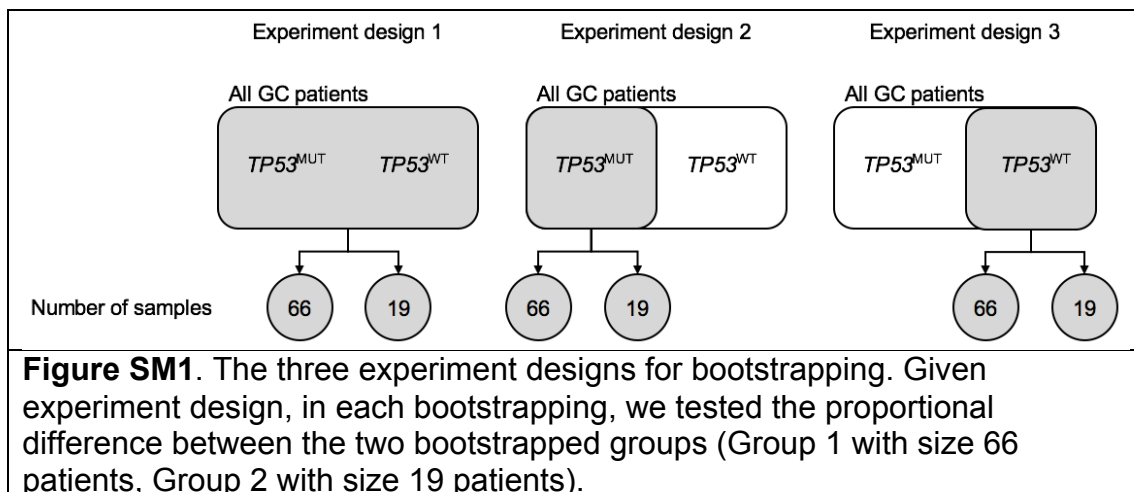

### Clinical and molecular profiles of bootstrapped samples

Given an experiment design, in each bootstrapping, we inspected patients' clinico-molecular categories according to Group 1 and Group 2: CIMP category, Copy number cluster, Lauren class, Molecular subtype, MSI status, and Race category. We performed the proportional test with R function "prop.test" under the null hypothesis where clinico-molecular profiles are not different between Groups 1 and 2.

### Analysis results

The result tables of the three experiments (experiment designs 1, 2, and 3) correspond to Supplementary Tables S6, S7, and S8 respectively.

## References in the Supplementary Tables

- 1 Liu, J. *et al.* Integrated exome and transcriptome sequencing reveals ZAK isoform usage in gastric cancer. *Nat Commun* **5**, 3830, doi:10.1038/ncomms4830 (2014).
- 2 Dancik, G. M. & Ru, Y. CCM: Correlation classification method (CCM). Available from <https://CRAN.R-project.org/package=CCM> (2013).
- 3 Lamb, J. *et al.* The Connectivity Map: using gene-expression signatures to connect small molecules, genes, and disease. *Science* **313**, 1929-1935, doi:10.1126/science.1132939 (2006).
- 4 Nam, S. *et al.* PATHOME: an algorithm for accurately detecting differentially expressed subpathways. *Oncogene* **33**, 4941-4951, doi:10.1038/onc.2014.80 (2014).
- 5 Hsu, S. D. *et al.* miRTarBase: a database curates experimentally validated microRNA-target interactions. *Nucleic Acids Res* **39**, D163-169, doi:10.1093/nar/gkq1107 (2011).
- 6 Wang, J., Lu, M., Qiu, C. & Cui, Q. TransmiR: a transcription factor-microRNA regulation database. *Nucleic Acids Res* **38**, D119-122, doi:10.1093/nar/gkp803 (2010).
